# Supplementary material
Source: PubMed Central journal article supplement (PMC6039242)
Supplement: NIHMS967517-supplement-1.pdf [file NIHMS967517-supplement-1.pdf]

Table S1: Individual Subject Data and Appearance in Figures/Tables. Individual subjects are listed with key demographic data. Appearance in figures and tables denoted by shaded boxes.

| Subject # | Group                   | Age (years)       | Sex              | Virus                                 | Fig 1             | Fig 2 | Fig 3 | Fig 4 | Fig 5 | Fig 6 | Fig S1 | Fig S2 | Fig S3 | Table 1 | Table 2 |  |  |
|-----------|-------------------------|-------------------|------------------|---------------------------------------|-------------------|-------|-------|-------|-------|-------|--------|--------|--------|---------|---------|--|--|
| NIV 102   | Noninvasive Ventilation | 2.00              | F                | RSV                                   |                   |       |       |       |       |       |        |        |        |         |         |  |  |
| NIV 103   |                         | 0.58              | F                | HMPV                                  |                   |       |       |       |       |       |        |        |        |         |         |  |  |
| NIV 105   |                         | 1.17              | F                | Adenovirus and Rhino/Enterovirus      |                   |       |       |       |       |       |        |        |        |         |         |  |  |
| NIV 108   |                         | 0.13              | M                | RSV                                   |                   |       |       |       |       |       |        |        |        |         |         |  |  |
| NIV 109   |                         | 0.06              | F                | Rhino/Enterovirus                     |                   |       |       |       |       |       |        |        |        |         |         |  |  |
| NIV 110   |                         | 0.50              | M                | RSV                                   |                   |       |       |       |       |       |        |        |        |         |         |  |  |
| NIV 111   |                         | 0.17              | M                | RSV and Rhino/Enterovirus             |                   |       |       |       |       |       |        |        |        |         |         |  |  |
| NIV 112   |                         | 0.17              | M                | HMPV and Rhino/Enterovirus            |                   |       |       |       |       |       |        |        |        |         |         |  |  |
| NIV 113   |                         | 0.50              | M                | RSV                                   |                   |       |       |       |       |       |        |        |        |         |         |  |  |
| NIV 114   |                         | 0.07              | M                | RSV                                   |                   |       |       |       |       |       |        |        |        |         |         |  |  |
| NIV 115   |                         | 0.58              | F                | RSV                                   |                   |       |       |       |       |       |        |        |        |         |         |  |  |
| NIV 116   |                         | 0.08              | F                | RSV                                   |                   |       |       |       |       |       |        |        |        |         |         |  |  |
| NIV 117   |                         | 1.75              | M                | RSV and Coronavirus HKU1              |                   |       |       |       |       |       |        |        |        |         |         |  |  |
| NIV 118   |                         | 0.17              | F                | RSV                                   |                   |       |       |       |       |       |        |        |        |         |         |  |  |
| NIV 119   |                         | 0.50              | M                | RSV and Coronavirus NL63              |                   |       |       |       |       |       |        |        |        |         |         |  |  |
| NIV 120   |                         | 0.33              | M                | RSV                                   |                   |       |       |       |       |       |        |        |        |         |         |  |  |
| NIV 121   |                         | 0.33              | M                | HMPV                                  |                   |       |       |       |       |       |        |        |        |         |         |  |  |
| NIV 122   |                         | 0.06              | M                | Parainfluenza 2                       |                   |       |       |       |       |       |        |        |        |         |         |  |  |
| NIV 123   |                         | 2.00              | M                | Parainfluenza 2                       |                   |       |       |       |       |       |        |        |        |         |         |  |  |
| NIV 124*  |                         | 0.75              | F                | RSV                                   |                   |       |       |       |       |       |        |        |        |         |         |  |  |
| NIV 125   |                         | 2.00              | M                | RSV                                   |                   |       |       |       |       |       |        |        |        |         |         |  |  |
| NIV 127   |                         | 0.16              | F                | RSV                                   |                   |       |       |       |       |       |        |        |        |         |         |  |  |
| NIV 129   |                         | 3.00              | F                | RSV                                   |                   |       |       |       |       |       |        |        |        |         |         |  |  |
| NIV 130*  |                         | 3.00              | M                | RSV                                   |                   |       |       |       |       |       |        |        |        |         |         |  |  |
| NIV 131   |                         | 0.17              | M                | RSV                                   |                   |       |       |       |       |       |        |        |        |         |         |  |  |
| NIV 132   |                         | 0.33              | M                | RSV                                   |                   |       |       |       |       |       |        |        |        |         |         |  |  |
| NIV 134   |                         | 0.08              | F                | RSV                                   |                   |       |       |       |       |       |        |        |        |         |         |  |  |
| NIV 135   |                         | 0.92              | M                | RSV                                   |                   |       |       |       |       |       |        |        |        |         |         |  |  |
| NIV 136   |                         | 1.50              | M                | RSV                                   |                   |       |       |       |       |       |        |        |        |         |         |  |  |
| NIV 137   |                         | 0.75              | F                | RSV                                   |                   |       |       |       |       |       |        |        |        |         |         |  |  |
| NIV 140   |                         | 0.17              | M                | Rhino/Enterovirus                     |                   |       |       |       |       |       |        |        |        |         |         |  |  |
| NIV 143   |                         | 3.00              | M                | Parainfluenza 1 and Rhino/Enterovirus |                   |       |       |       |       |       |        |        |        |         |         |  |  |
| NIV 147   |                         | 1.00              | M                | RSV                                   |                   |       |       |       |       |       |        |        |        |         |         |  |  |
| NIV 148   |                         | 0.30              | F                | RSV                                   |                   |       |       |       |       |       |        |        |        |         |         |  |  |
| ETT 042   |                         | Invasive w/ PARDS | 1.00             | M                                     | HMPV              |       |       |       |       |       |        |        |        |         |         |  |  |
| ETT 043   |                         |                   | 0.21             | M                                     | Coronavirus NL63  |       |       |       |       |       |        |        |        |         |         |  |  |
| ETT 046   |                         |                   | 6.00             | F                                     | RSV               |       |       |       |       |       |        |        |        |         |         |  |  |
| ETT 047   |                         |                   | 6.00             | M                                     | HMPV              |       |       |       |       |       |        |        |        |         |         |  |  |
| ETT 048   |                         |                   | 10.00            | F                                     | Rhino/Enterovirus |       |       |       |       |       |        |        |        |         |         |  |  |
| ETT 083   |                         |                   | 2.00             | F                                     | Rhino/Enterovirus |       |       |       |       |       |        |        |        |         |         |  |  |
| ETT 084   | 0.33                    |                   | M                | RSV                                   |                   |       |       |       |       |       |        |        |        |         |         |  |  |
| ETT 088   | 0.17                    |                   | M                | RSV                                   |                   |       |       |       |       |       |        |        |        |         |         |  |  |
| ETT 090   | 1.00                    |                   | M                | HMPV                                  |                   |       |       |       |       |       |        |        |        |         |         |  |  |
| ETT 103   | 1.00                    |                   | M                | RSV                                   |                   |       |       |       |       |       |        |        |        |         |         |  |  |
| ETT 104   | 0.30                    |                   | M                | RSV                                   |                   |       |       |       |       |       |        |        |        |         |         |  |  |
| ETT 105   | 1.00                    |                   | F                | Influenza B                           |                   |       |       |       |       |       |        |        |        |         |         |  |  |
| ETT 118   | 0.25                    |                   | F                | RSV                                   |                   |       |       |       |       |       |        |        |        |         |         |  |  |
| NIV 142   | 0.25                    |                   | M                | RSV and Coronavirus HKU1              |                   |       |       |       |       |       |        |        |        |         |         |  |  |
| ETT 078   | Invasive - no PARDS     |                   | 2.00             | M                                     | HMPV              |       |       |       |       |       |        |        |        |         |         |  |  |
| ETT 081   |                         |                   | 0.67             | M                                     | HMPV              |       |       |       |       |       |        |        |        |         |         |  |  |
| ETT 086   |                         | 0.03              | F                | RSV                                   |                   |       |       |       |       |       |        |        |        |         |         |  |  |
| ETT 095   |                         | 0.83              | F                | Rhino/Enterovirus                     |                   |       |       |       |       |       |        |        |        |         |         |  |  |
| ETT 096   |                         | 0.15              | M                | RSV                                   |                   |       |       |       |       |       |        |        |        |         |         |  |  |
| ETT 097   |                         | 1.00              | M                | Parainfluenza 2                       |                   |       |       |       |       |       |        |        |        |         |         |  |  |
| ETT 100   |                         | 0.30              | M                | Coronavirus OC43                      |                   |       |       |       |       |       |        |        |        |         |         |  |  |
| ETT 106   |                         | 0.30              | F                | RSV                                   |                   |       |       |       |       |       |        |        |        |         |         |  |  |
| ETT 107   |                         | 1.00              | F                | Parainfluenza 3                       |                   |       |       |       |       |       |        |        |        |         |         |  |  |
| ETT 108   |                         | 0.67              | M                | Rhino/Enterovirus                     |                   |       |       |       |       |       |        |        |        |         |         |  |  |
| ETT 110   | 0.08                    | M                 | RSV              |                                       |                   |       |       |       |       |       |        |        |        |         |         |  |  |
| ETT 111   | 0.08                    | M                 | RSV              |                                       |                   |       |       |       |       |       |        |        |        |         |         |  |  |
| ETT 113   | 2.00                    | M                 | Coronavirus NL63 |                                       |                   |       |       |       |       |       |        |        |        |         |         |  |  |
| ETT 116   | 1.50                    | M                 | Adenovirus       |                                       |                   |       |       |       |       |       |        |        |        |         |         |  |  |
| FLD 001   |                         | 28.00             | M                | na                                    |                   |       |       |       |       |       |        |        |        |         |         |  |  |
| FLD 002   |                         | 27.00             | F                | na                                    |                   |       |       |       |       |       |        |        |        |         |         |  |  |
| FLD 003   |                         | 28.00             | M                | na                                    |                   |       |       |       |       |       |        |        |        |         |         |  |  |
| FLD 004   |                         | 32.00             | M                | na                                    |                   |       |       |       |       |       |        |        |        |         |         |  |  |
| FLD 005   |                         | 28.00             | F                | na                                    |                   |       |       |       |       |       |        |        |        |         |         |  |  |
| FLD 006   |                         | 35.00             | M                | na                                    |                   |       |       |       |       |       |        |        |        |         |         |  |  |
| AUD 060   |                         | 1.25              | M                | na                                    |                   |       |       |       |       |       |        |        |        |         |         |  |  |
| AUD 061   |                         | 2.00              | M                | na                                    |                   |       |       |       |       |       |        |        |        |         |         |  |  |
| AUD 062   |                         | 2.00              | M                | na                                    |                   |       |       |       |       |       |        |        |        |         |         |  |  |
| AUD 063   |                         | 0.42              | M                | na                                    |                   |       |       |       |       |       |        |        |        |         |         |  |  |
| AUD 064   |                         | 4.30              | M                | na                                    |                   |       |       |       |       |       |        |        |        |         |         |  |  |

\*Denotes subject meeting criteria for "At-risk PARDS", data analyzed with PARDS group

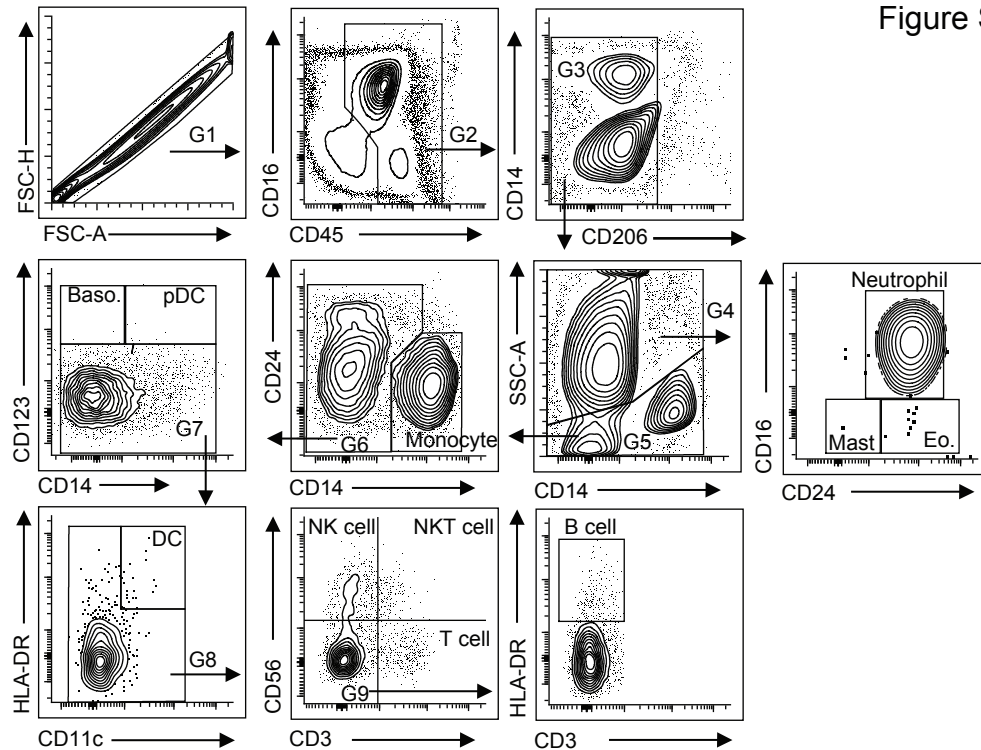

**Figure S1: Myeloid Cell gating strategy.** Single cells selected by forward scatter properties (G1). Cells from G1 gated for expression of CD45<sup>+</sup> and CD16<sup>+/−</sup> (G2). Cells from G2 gated by CD206<sup>−</sup> and CD14<sup>+/−</sup> (G3). Cells from G3 shown by expression of side scatter and CD14 and gated as G4 = side scatter high, CD14<sup>+/−</sup> and G5 = side scatter low, CD14<sup>+/−</sup>. Cells gated as G4 shown by expression of CD16 and CD24; Neutrophils gated as CD16<sup>+</sup> CD24<sup>+</sup>, Eosinophils gated as CD16<sup>−</sup> and CD24<sup>+</sup>, and Mast Cells gated as CD16<sup>−</sup> and CD24<sup>−</sup>. Cells gated as G5 shown by expression of CD24 and CD14; Monocytes gated as CD14<sup>+</sup> and remaining gated as G6 = CD24<sup>+/−</sup> and CD14<sup>+</sup>. Cells gated as G6 shown by expression of CD123 and CD14; Basophils gated as CD123<sup>+</sup> and CD14<sup>−</sup>, plasmacytoid dendritic cells gated as CD123<sup>+</sup> and CD14<sup>+</sup>, remaining cells (CD123<sup>−</sup> and CD14<sup>+/−</sup>) gated as G7. Cells gated as G7 depicted by expression of HLA-DR and CD11c with Dendritic Cells gated as HLA-DR<sup>+</sup> and CD11c<sup>+</sup> with remaining cells gated as G8. Cells gated as G8 shown by expression of CD56 and CD3 with NK cells gated as CD56<sup>+</sup> and CD3<sup>−</sup>, and NK T cells gated as CD56<sup>+</sup> and CD3<sup>+</sup>, T cells gated as CD56<sup>−</sup> and CD3<sup>+</sup> with remaining cells gated as G9. Cells gated from G9 depicted by expression of HLA-DR and CD3 with B cells gated as HLA-DR<sup>+</sup> and CD3<sup>−</sup>.

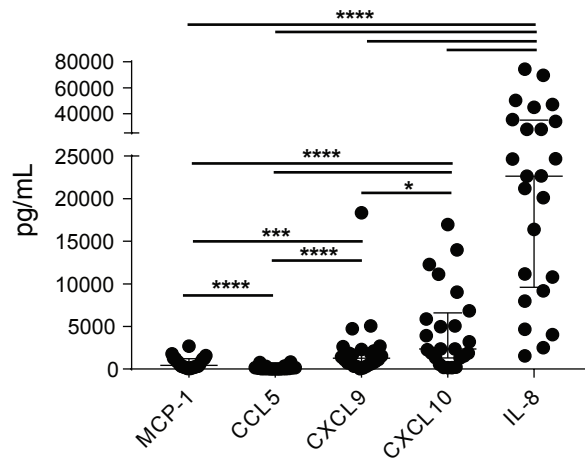

**Figure S2: IL-8 is the predominant cytokine in the URT during pediatric VRTI.** Graph shows chemokine concentration (pg/mL) in the URT during the first 48 hours of study enrollment compiled from 24 subjects. P values obtained by Wilcoxon matched pairs signed rank test. P values represented by \*; (\* =  $p < 0.05$ , \*\*\* =  $p < 0.001$ , \*\*\*\* =  $p < 0.0001$ ).

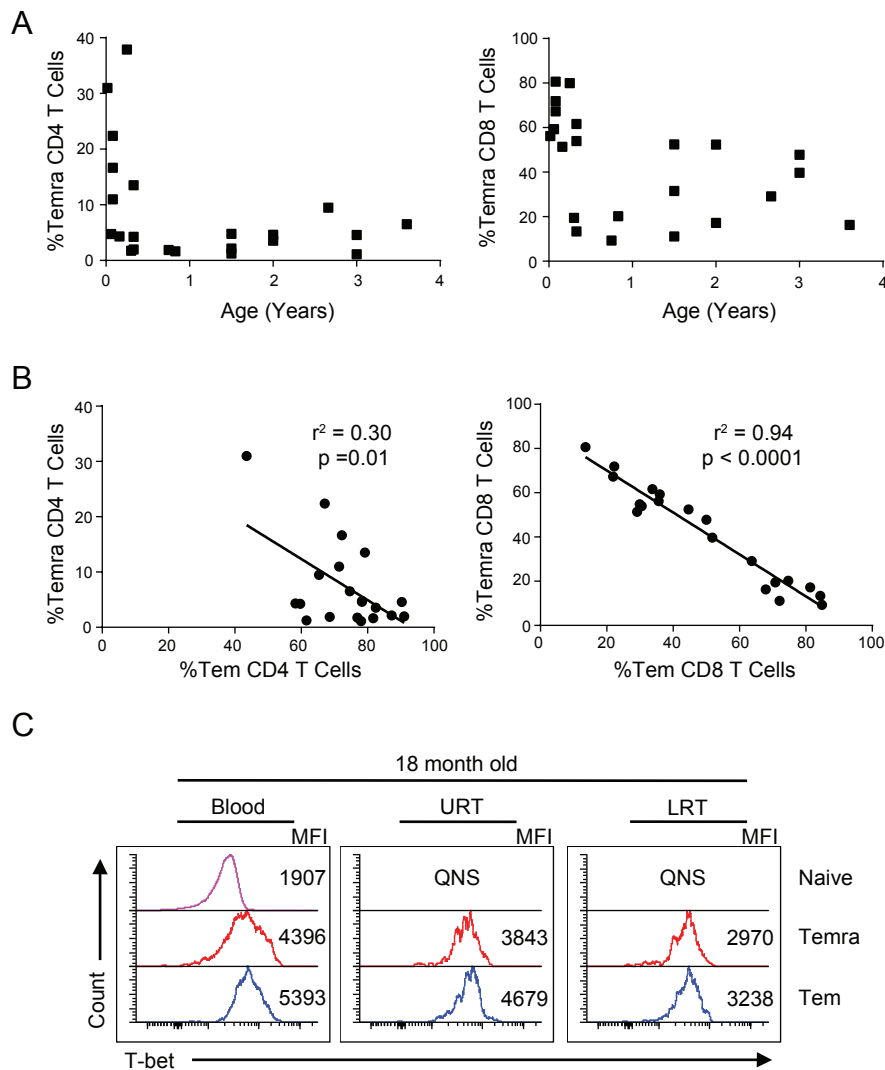

**Figure S3: Characteristics of local Tem and Temra responses during VRTI.** (A) Depicts proportions of Temra cells found in the URT during VRTI as a function of subject age for CD4<sup>+</sup> (left) and CD8<sup>+</sup> (right) T cells (n=20). (B) Depicts proportions of Temra (y axis) and Tem (x axis) subsets in the URT during VRTI among CD4<sup>+</sup> (left) and CD8<sup>+</sup> (right) T cells (n=20). Statistical analysis performed using linear regression. (C) Representative paired samples from a single infected subject demonstrating expression of T-bet (x axis) with stated median fluorescence intensity (MFI) on T cell subsets; Naïve (top), Temra (middle), and Tem (bottom). QNS = quantity not sufficient.
